# Supplementary material
Source: publisher site journal article supplement (http://kjim.org/upload/media/kjim-2021-101-suppl1.pdf)
Supplement: Supplementary file 1 [file kjim-2021-101-suppl1.pdf]

**Supplementary Table 1. Baseline clinical characteristics of propensity-score matched patients and the standardized differences of variables among unadjusted, propensity-score matched, and IPW-adjusted cohort among three groups**

| Characteristic                                   | Unchanged clopidogrel (n = 1,321) | P2Y12RI switching (n = 1,321) | p value | Unadjusted SMD | PSM SMD | IPW SMD | Unchanged potent P2Y12RIs (n = 1,239) | P2Y12RI switching (n = 1,239) | p value | Unadjusted SMD | PSM SMD | IPW SMD |
|--------------------------------------------------|-----------------------------------|-------------------------------|---------|----------------|---------|---------|---------------------------------------|-------------------------------|---------|----------------|---------|---------|
| Age, yr                                          | 61.84 ± 0.35                      | 62.03 ± 0.34                  | 0.688   | -0.2997        | 0.0154  | -0.0136 | 61.36 ± 0.34                          | 61.65 ± 0.34                  | 0.550   | 0.1481         | 0.0243  | -0.0051 |
| Age ≥ 75 years                                   | 218 (16.5)                        | 223 (16.9)                    | 0.835   | -0.3620        | 0.0150  | -0.0208 | 189 (15.3)                            | 196 (15.8)                    | 0.739   | 0.1849         | 0.0237  | 0.0025  |
| Male gender                                      | 1,003 (75.9)                      | 1,030 (78.0)                  | 0.230   | 0.1805         | 0.0636  | 0.0014  | 986 (79.6)                            | 980 (79.1)                    | 0.804   | -0.1651        | -0.0163 | -0.0048 |
| Hypertension                                     | 650 (49.2)                        | 637 (48.2)                    | 0.640   | -0.1049        | -0.0217 | -0.0148 | 593 (47.9)                            | 589 (47.5)                    | 0.904   | 0.0979         | -0.0071 | -0.0021 |
| Diabetes                                         | 333 (25.2)                        | 332 (25.1)                    | 1.000   | -0.1103        | -0.0022 | -0.0051 | 308 (24.9)                            | 306 (24.7)                    | 0.963   | 0.0383         | -0.0048 | -0.0068 |
| Dyslipidemia                                     | 140 (10.6)                        | 132 (10.0)                    | 0.654   | -0.1060        | -0.0362 | -0.0328 | 126 (10.2)                            | 126 (10.2)                    | 1.000   | -0.0601        | 0       | -0.0050 |
| Current smoker                                   | 548 (41.5)                        | 566 (42.8)                    | 0.503   | 0.1815         | 0.0308  | -0.0071 | 550 (44.4)                            | 545 (44.0)                    | 0.871   | -0.1012        | -0.0090 | 0.0016  |
| Family history of coronary artery disease        | 83 (6.3)                          | 81 (6.1)                      | 0.936   | -0.0211        | -0.0143 | 0.0601  | 81 (6.5)                              | 75 (6.1)                      | 0.679   | -0.1109        | -0.0453 | 0.0072  |
| Previous history of angina                       | 133 (10.1)                        | 112 (8.5)                     | 0.180   | -0.1459        | -0.0994 | -0.0112 | 94 (7.6)                              | 97 (7.8)                      | 0.880   | 0.2458         | 0.0188  | -0.0075 |
| Previous history of heart failure                | 19 (1.4)                          | 23 (1.7)                      | 0.641   | 0.0755         | 0.0970  | -0.0479 | 13 (1.0)                              | 17 (1.4)                      | 0.582   | 0.5506         | 0.1497  | -0.0138 |
| Previous history of MI                           | 99 (7.5)                          | 112 (8.5)                     | 0.389   | 0.1395         | 0.0739  | 0.0038  | 86 (6.9)                              | 90 (7.3)                      | 0.815   | 0.3781         | 0.0270  | -0.0103 |
| Previous history of CVA/TIA                      | 67 (5.1)                          | 62 (4.7)                      | 0.718   | -0.3032        | -0.0450 | -0.0307 | 55 (4.4)                              | 52 (4.2)                      | 0.843   | 0.1703         | -0.0323 | 0.0162  |
| Killip class                                     |                                   |                               | 0.339   | -0.1885        | 0.0562  | 0.0060  |                                       |                               | 0.653   | 0.0921         | 0.0313  | -0.0085 |
| I                                                | 1,120 (84.8)                      | 1,102 (83.4)                  |         |                |         |         | 1,057 (85.3)                          | 1,048 (84.6)                  |         |                |         |         |
| II-IV                                            | 201 (15.2)                        | 219 (16.6)                    |         |                |         |         | 182 (14.7)                            | 191 (15.4)                    |         |                |         |         |
| Final diagnosis                                  |                                   |                               | 0.276   | 0.0519         | -0.0484 | 0.0085  | 618 (49.9)                            | 606 (48.9)                    | 0.659   | -0.2232        | 0.0214  | 0.0080  |
| Non-ST segment elevation MI                      | 636 (48.1)                        | 665 (50.3)                    |         |                |         |         |                                       |                               |         |                |         |         |
| ST segment elevation MI                          | 685 (51.9)                        | 656 (49.7)                    |         |                |         |         | 621 (50.1)                            | 633 (51.1)                    |         |                |         |         |
| Left ventricular ejection fraction, %            | 83.42 ± 1.01                      | 83.59 ± 1.02                  | 0.905   | 0.0328         | -0.0198 | -0.0055 | 52.66 ± 0.29                          | 52.39 ± 0.30                  | 0.520   | -0.0724        | -0.0259 | -0.0029 |
| Creatinine clearance, mL/min/1.73 m <sup>2</sup> | 52.41 ± 0.29                      | 52.20 ± 0.29                  | 0.615   | 0.3057         | 0.0046  | 0       | 84.93 ± 1.00                          | 84.71 ± 1.05                  | 0.882   | -0.0966        | -0.0061 | -0.0051 |

Supplementary Table 1. Continued

| Characteristic                         | Unchanged clopidogrel (n = 1,321) | P2Y12RI switching (n = 1,321) | p value | Unadjusted SMD | PSM SMD | IPW SMD | Unchanged potent P2Y12RIs (n = 1,239) | P2Y12RI switching (n = 1,239) | p value | Unadjusted SMD | PSM SMD | IPW SMD |
|----------------------------------------|-----------------------------------|-------------------------------|---------|----------------|---------|---------|---------------------------------------|-------------------------------|---------|----------------|---------|---------|
| Vascular access                        |                                   |                               | 1.000   | 0.2960         | 0.0017  | 0.0343  |                                       |                               | 0.228   | 0.1004         | -0.0552 | 0.0068  |
| Trans-radial approach                  | 648 (49.1)                        | 649 (49.1)                    |         |                |         |         | 630 (50.8)                            | 599 (48.3)                    |         |                |         |         |
| Trans-femoral approach                 | 673 (50.9)                        | 672 (50.9)                    |         |                |         |         | 609 (49.2)                            | 640 (51.7)                    |         |                |         |         |
| Infarct-related artery                 |                                   |                               | 0.950   | 0.0291         | 0.0200  | -0.0136 |                                       |                               | 0.867   | 0.0233         | 0.0249  | -0.0012 |
| Left anterior descending               | 617 (46.7)                        | 628 (47.5)                    |         |                |         |         | 575 (46.4)                            | 585 (47.2)                    |         |                |         |         |
| Left circumflex                        | 218 (16.5)                        | 208 (15.8)                    |         |                |         |         | 211 (17.0)                            | 199 (16.1)                    |         |                |         |         |
| Right coronary                         | 454 (34.4)                        | 452 (34.2)                    |         |                |         |         | 427 (34.5)                            | 425 (34.3)                    |         |                |         |         |
| Left main                              | 32 (2.4)                          | 33 (2.5)                      |         |                |         |         | 26 (2.1)                              | 30 (2.4)                      |         |                |         |         |
| Involved vessel number                 |                                   |                               | 0.785   | -0.0844        | 0.0134  | 0.0193  |                                       |                               | 0.841   | 0.0120         | -0.0107 | -0.0079 |
| Single vessel                          | 684 (51.8)                        | 676 (51.2)                    |         |                |         |         | 637 (51.4)                            | 643 (51.9)                    |         |                |         |         |
| Left main or multi-vessel disease      | 637 (48.2)                        | 645 (48.8)                    |         |                |         |         | 602 (48.6)                            | 596 (48.1)                    |         |                |         |         |
| ACC/AHA lesion classification          |                                   |                               | 0.708   | 0.2323         | -0.0302 | 0.0276  |                                       |                               | 0.948   | -0.1059        | 0.0092  | 0.0070  |
| Type A/B1                              | 140 (10.6)                        | 147 (11.1)                    |         |                |         |         | 135 (10.9)                            | 133 (10.7)                    |         |                |         |         |
| Type B2/C                              | 1,181 (89.4)                      | 1,174 (88.9)                  |         |                |         |         | 1,104 (89.1)                          | 1,106 (89.3)                  |         |                |         |         |
| Procedure for target lesion            |                                   |                               | 0.936   | -0.0802        | -0.0255 | 0.0188  |                                       |                               | 0.904   | 0.0785         | -0.0196 | -0.0109 |
| Only balloon angioplasty               | 70 (5.3)                          | 67 (5.1)                      |         |                |         |         | 60 (4.8)                              | 58 (4.7)                      |         |                |         |         |
| Bare metal stent                       | 36 (2.7)                          | 34 (2.6)                      |         |                |         |         | 30 (2.4)                              | 27 (2.2)                      |         |                |         |         |
| Drug-eluting stent                     | 1,215 (92.0)                      | 1,220 (92.3)                  |         |                |         |         | 1,149 (92.7)                          | 1,154 (93.1)                  |         |                |         |         |
| Use of glycoprotein IIb/IIIa inhibitor | 188 (14.2)                        | 213 (16.1)                    | 0.176   | 0.2791         | 0.0811  | 0.0320  | 197 (15.9)                            | 209 (16.9)                    | 0.551   | -0.0749        | 0.0390  | 0.0083  |

Supplementary Table 1. Continued

| Characteristic           | Unchanged clopidogrel (n = 1,321) | P2Y12RI switching (n = 1,321) | p value | Unadjusted SMD | PSM SMD | IPW SMD | Unchanged potent P2Y12RIs (n = 1,239) | P2Y12RI switching (n = 1,239) | p value | Unadjusted SMD | PSM SMD | IPW SMD |
|--------------------------|-----------------------------------|-------------------------------|---------|----------------|---------|---------|---------------------------------------|-------------------------------|---------|----------------|---------|---------|
| In-hospital medications  |                                   |                               |         |                |         |         |                                       |                               |         |                |         |         |
| Aspirin                  | 1,319 (99.8)                      | 1,318 (99.8)                  | 1.000   | -0.2834        | -0.2240 | -0.2104 | 1,238 (99.9)                          | 1,237 (99.8)                  | 1.000   | -0.9049        | -0.3826 | -0.1586 |
| Clopidogrel              | 1,321 (100.0)                     | 1,321 (100.0)                 | -       | -              | -       | -       | -                                     | 1,239 (100.0)                 | -       | -              | -       | -       |
| Ticagrelor               | -                                 | 845 (82.0)                    | -       | -              | -       | -       | 807 (65.1)                            | 801 (64.6)                    | 0.833   | -0.2263        | -0.0117 | -0.0005 |
| Prasugrel                | -                                 | 476 (16.0)                    | -       | -              | -       | -       | 432 (34.9)                            | 438 (35.4)                    | 0.833   | 0.2263         | 0.0117  | 0.0005  |
| Cilostazol               | 33 (2.5)                          | 40 (3.0)                      | 0.410   | -0.8440        | 0.0991  | -0.0589 | 10 (0.8)                              | 10 (0.8)                      | 1.000   | 1.0030         | 0       | 0.0221  |
| Beta-blocker             | 1,102 (83.4)                      | 1,109 (84.0)                  | 0.713   | 0.0251         | 0.0214  | -0.0081 | 1,058 (85.4)                          | 1,049 (84.7)                  | 0.652   | -0.0756        | -0.0315 | 0.0050  |
| Calcium channel blockers | 77 (5.8)                          | 76 (5.8)                      | 0.934   | -0.1319        | -0.0077 | 0.0015  | 69 (5.6)                              | 65 (5.2)                      | 0.790   | 0.1449         | -0.0348 | 0.0066  |
| ACEi or ARB              | 1,061 (80.3)                      | 1,056 (79.9)                  | 0.845   | -0.0192        | -0.0131 | -0.0190 | 1,001 (80.8)                          | 996 (80.4)                    | 0.839   | -0.0092        | -0.0142 | 0.0002  |
| Statin                   | 1,253 (94.9)                      | 1,251 (94.7)                  | 0.930   | 0.2174         | -0.0169 | 0.0417  | 1,171 (94.5)                          | 1,179 (95.2)                  | 0.525   | -0.0538        | 0.0728  | 0.0107  |
| Oral anticoagulants      | 40 (3.0)                          | 44 (3.3)                      | 0.660   | -0.0085        | 0.0543  | 0.0076  | 26 (2.1)                              | 30 (2.4)                      | 0.685   | 0.5643         | 0.0807  | 0.0074  |

Values are presented as mean ± standard error of mean or number (%).

IPW, inverse probability weighting; RI, receptor inhibitor; SMD, standardized mean difference; PSM, propensity score-matched; MI, myocardial infarction; CVA, cerebrovascular accident; TIA, transient ischemic attack; ACC, American College of Cardiology; AHA, American Heart Association; ACEi, angiotensin converting enzyme inhibitor; ARB, angiotensin II receptor blocker.

**Supplementary Table 2. In-hospital clinical outcomes among three groups**

|                                                 | No. (%)   |          | Unadjusted           |                      | Multivariate-adjusted |         | Propensity score-matched |         | IPW-adjusted         |         |
|-------------------------------------------------|-----------|----------|----------------------|----------------------|-----------------------|---------|--------------------------|---------|----------------------|---------|
|                                                 |           |          | OR (95% CI)          | p value <sup>a</sup> | OR (95% CI)           | p value | OR (95% CI)              | p value | OR (95% CI)          | p value |
| Unchanged clopidogrel vs. P2Y12RI switching     | 4,674     | 1,399    |                      |                      |                       |         |                          |         |                      |         |
| All-cause death                                 | 162 (3.5) | 24 (1.7) | 0.486 (0.315–0.750)  | 0.001                | 1.020 (0.467–2.227)   | 0.961   | 1.060 (0.544–2.065)      | 0.865   | 0.875 (0.653–1.173)  | 0.653   |
| Cardiac death                                   | 138 (3.0) | 16 (1.1) | 0.380 (0.226–0.640)  | <0.001               | 0.581 (0.231–1.464)   | 0.250   | 0.664 (0.297–1.484)      | 0.318   | 0.643 (0.445–0.931)  | 0.019   |
| Non-fatal MI                                    | 9 (0.2)   | 11 (0.8) | 4.108 (1.699–9.933)  | 0.002                | 4.186 (1.705–10.278)  | 0.002   | 2.511 (0.786–8.028)      | 0.120   | 3.184 (1.591–6.372)  | 0.001   |
| Definite stent thrombosis                       | 7 (0.1)   | 10 (0.7) | 4.800 (1.824–12.633) | 0.002                | 3.824 (1.420–10.299)  | 0.008   | 3.014 (0.814–11.157)     | 0.099   | 3.659 (1.689–7.926)  | 0.001   |
| Stroke                                          | 35 (0.7)  | 8 (0.6)  | 0.762 (0.353–1.647)  | 0.588                | 0.872 (0.398–1.910)   | 0.731   | 0.888 (0.342–2.309)      | 0.808   | 0.966 (0.624–1.497)  | 0.879   |
| MACEs                                           | 174 (3.7) | 35 (2.5) | 0.664 (0.459–0.959)  | 0.029                | 1.077 (0.660–1.759)   | 0.766   | 1.079 (0.629–1.850)      | 0.783   | 1.017 (0.787–1.315)  | 0.896   |
| TIMI major bleeding                             | 63 (1.3)  | 28 (2.0) | 1.495 (0.954–2.342)  | 0.080                | 1.611 (0.987–2.631)   | 0.056   | 1.817 (0.962–3.431)      | 0.066   | 1.735 (1.300–2.315)  | <0.001  |
| TIMI minor bleeding                             | 108 (2.3) | 51 (3.6) | 1.600 (1.140–2.244)  | 0.007                | 1.964 (1.364–2.829)   | <0.001  | 2.082 (1.282–3.380)      | 0.003   | 1.946 (1.563–2.423)  | <0.001  |
| TIMI major or minor bleeding                    | 151 (3.2) | 66 (4.7) | 1.483 (1.104–1.993)  | 0.011                | 1.813 (1.311–2.507)   | <0.001  | 1.959 (1.284–2.988)      | 0.002   | 1.818 (1.504–2.197)  | <0.001  |
| NACEs                                           | 222 (4.7) | 58 (4.1) | 0.867 (0.646–1.165)  | 0.383                | 1.339 (0.923–1.941)   | 0.124   | 1.356 (0.885–2.078)      | 0.162   | 1.324 (1.085–1.615)  | 0.006   |
| Unchanged potent P2Y12RIs vs. P2Y12RI switching | 2,403     | 1,399    |                      |                      |                       |         |                          |         |                      |         |
| All-cause death                                 | 60 (2.5)  | 24 (1.7) | 0.682 (0.423–1.099)  | 0.137                | 0.310 (0.090–1.068)   | 0.064   | 0.579 (0.298–1.124)      | 0.106   | 0.637 (0.421–0.962)  | 0.032   |
| Cardiac death                                   | 49 (2.0)  | 16 (1.1) | 0.556 (0.315–0.981)  | 0.043                | 0.167 (0.037–0.748)   | 0.019   | 0.417 (0.182–0.957)      | 0.039   | 0.447 (0.265–0.754)  | 0.003   |
| Non-fatal MI                                    | 9 (0.4)   | 11 (0.8) | 2.108 (0.871–5.100)  | 0.105                | 2.344 (0.965–5.691)   | 0.060   | 2.512 (0.786–8.032)      | 0.120   | 2.546 (1.357–4.779)  | 0.004   |
| Definite stent thrombosis                       | 7 (0.3)   | 10 (0.7) | 2.464 (0.936–6.488)  | 0.076                | 2.792 (1.056–7.383)   | 0.038   | 3.015 (0.814–11.162)     | 0.098   | 2.865 (1.423–5.766)  | 0.003   |
| Stroke                                          | 3 (0.1)   | 8 (0.6)  | 4.601 (1.219–17.371) | 0.023                | 4.179 (1.103–15.836)  | 0.035   | 6.024 (0.724–50.113)     | 0.097   | 3.733 (1.342–10.380) | 0.012   |
| MACEs                                           | 61 (2.5)  | 35 (2.5) | 0.985 (0.647–1.501)  | 1.000                | 1.208 (0.672–2.171)   | 0.529   | 1.000 (0.565–1.771)      | 1.000   | 1.135 (0.808–1.594)  | 0.465   |
| TIMI major bleeding                             | 65 (2.7)  | 28 (2.0) | 0.735 (0.469–1.150)  | 0.192                | 0.696 (0.432–1.122)   | 0.137   | 0.545 (0.318–0.934)      | 0.027   | 0.700 (0.514–0.954)  | 0.024   |
| TIMI minor bleeding                             | 92 (3.8)  | 51 (3.6) | 0.950 (0.671–1.347)  | 0.860                | 0.920 (0.638–1.328)   | 0.658   | 0.775 (0.524–1.145)      | 0.200   | 0.950 (0.749–1.206)  | 0.674   |
| TIMI major or minor bleeding                    | 132 (5.5) | 66 (4.7) | 0.852 (0.629–1.153)  | 0.325                | 0.837 (0.605–1.157)   | 0.281   | 0.731 (0.515–1.037)      | 0.079   | 0.861 (0.699–1.059)  | 0.157   |
| NACEs                                           | 117 (4.9) | 58 (4.1) | 0.845 (0.612–1.166)  | 0.336                | 0.816 (0.554–1.203)   | 0.305   | 0.732 (0.489–1.095)      | 0.129   | 0.879 (0.694–1.113)  | 0.284   |

Values are presented as number (%).

RI, receptor inhibitor; IPW, inverse probability weighting; OR, odds ratio; CI, confidence interval; MI, myocardial infarction; MACE, major adverse cardiovascular event; TIMI, thrombolysis in myocardial infarction; NACE, net adverse cardiovascular event.

<sup>a</sup>p value < 0.0167 was considered statistically significant.
